# Supplementary material
Source: PubMed Central journal article supplement (PMC6092616)
Supplement: EMBJ-37-e99134-s001.pdf [file EMBJ-37-e99134-s001.pdf]

## Appendix

**Table S1- Primer sequences**

| Gene Name (ID)     | Primer Name              | Primer Sequence             |
|--------------------|--------------------------|-----------------------------|
| EXPA1 (AT1G69530)  | EXPA1 RT-fwd             | AAGGCTATGGAACCAACACG        |
|                    | EXPA1 RT-fwd             | GTTGTTCCGGTAAGGCGTTGT       |
|                    | EXPA1 ChIP1 fwd          | GTCGTTAAAACCGGCTTCG         |
|                    | EXPA1 ChIP1 rev          | GATGGTAGGAACAATGGCAAA       |
|                    | EXPA1 ChIP2 fwd          | AAAAACTATGTCTCGCAGAATGAA    |
|                    | EXPA1 ChIP2 rev          | TGCATATAAGTCAGAAAATAAAGAGCA |
|                    | EXPA1 ChIP3 fwd          | TGATGAAAAAGAAGAGAGAAATGAAA  |
|                    | EXPA1 ChIP3 rev          | TTTGAAAAACACGTGACCA         |
|                    | EXPA1 ChIP4 fwd          | TTTTCTTTGGTAAAATGCAAAACA    |
|                    | EXPA1 ChIP4 rev          | CCAAACGTTAACATGCGGTA        |
|                    | EXPA1 ChIP5 fwd          | CATGCGGAGCTATCTCTGTG        |
|                    | EXPA1 ChIP5 rev          | ATTTTCTGAGAGAAACAAAACAAAA   |
|                    | EXPA1 ChIP6 fwd          | CCCTAATAAATACATTTGCAGAAACA  |
|                    | EXPA1 ChIP6 rev          | AATTTTTACATGTGTTTGGTGATGA   |
|                    | EXPA1 ChIP7 fwd          | CCAGACACGACTTCTTCATCG       |
|                    | EXPA1 ChIP7 rev          | GTTTCGATGCGTAACCATCTT       |
|                    | EXPA1 ChIP8 fwd          | CTCCAGCCTCCATATTGACC        |
|                    | EXPA1 ChIP8 rev          | TCAAGAAACAATTTAAGCTTGAGAAA  |
|                    | EXPA1 ChIP9 fwd          | GGTTTTTGGTCCCCAACAAATA      |
|                    | EXPA1 ChIP9 rev          | GCAATTTTATTTTTCTGGTTTTTCA   |
| EXPA1 ChIP10 fwd   | TCCAATTCTAAACCAAACAACAGA |                             |
| EXPA1 ChIP10 rev   | TTGGAAGGTTTGATCTTTCTTCTT |                             |
|                    | pEXPA1 fwd               | TCTGGTCACGTGTTTTTCCA        |
|                    | pEXPA1 rev               | CGTTCTTTTTCTTTTTGTGTAAA     |
|                    | gEXPA1 fwd               | ATGGCTCTTGTCACCTTCTTGT      |
|                    | gEXPA1 rev               | AGCACTCGAAGCACCCTTC         |
| EXPA10 (AT1G26770) | pEXPA10 fwd              | AGCGGAAACGATGAAAAAGA        |
|                    | pEXPA10 rev              | GGGTGATATAAAATCAATTACTTA    |
|                    | gEXPA10 fwd              | ATGTGCAGGTTGTTAACACA        |
|                    | gEXPA10 rev              | TTAACGGAAGTGTCCACC          |
| EXPA14 (AT5G56320) | pEXPA14 fwd              | TTCCATTTGCACGGAAAAGT        |
|                    | pEXPA14 rev              | TTTCTCTGCCTTTTTATTCTCTAC    |
|                    | gEXPA14 fwd              | ATGGAGTTTTTTGGTAAA          |
|                    | gEXPA14 rev              | AAAAATTATAAATTAACCTGA       |
| EXPA15 (AT2G03090) | pEXPA15 fwd              | GCAAAATACTGCAAGGAAGACA      |
|                    | pEXPA15 rev              | TCTCTTTGAGAAAGTGCAGAGC      |
|                    | gEXPA15 fwd              | ATGTTTCATGTAATATAACATC      |
|                    | gEXPA15 rev              | AATCACACAAAACAGATAAAAT      |
| AHA1 (AT2G18960)   | AHA1 RT fwd              | AATTTTCGCCACTGGAATTG        |
|                    | AHA1 RT rev              | ACCAACTCCTTGACCTGGTG        |
|                    | AHA1 ChIP int4 fwd       | TTTTTGAAGTCTTTGTCTTTTG      |
|                    | AHA1 ChIP int4 rev       | GTCCGGTTAAGGGTATTTTCG       |
|                    | AHA1 neg4 fwd            | GGCACAAGCTCAAAGGACAT        |
|                    | AHA1 neg4 rev            | GCTATCTCGGCCCTTCTCTT        |
|                    | pAHA1 fwd                | AAATGAGAAAAACCTGCCATA       |
|                    | pAHA1 rev                | CTTCACCCAGAAGAAATCAACA      |
|                    | gAHA1 fwd                | ATGTCAGGTCTCGAAGATATCAA     |

|                  |                    |                           |
|------------------|--------------------|---------------------------|
|                  | gAHA1 rev          | CACAGTGTAGTGATGTCCTGCTG   |
| AHA2 (AT4G30190) | AHA2 RT fwd        | TGCTCAAAGGACACTTCACG      |
|                  | AHA2 RT rev        | GCCCTTTAGCTTCACGACTG      |
|                  | AHA2 ChIP int2 fwd | CGGTTACAAAATCATCAAAGTTTTC |
|                  | AHA2 ChIP int2 rev | CGATCAGATGACCAAATCCAA     |
|                  | AHA2 ChIP int4 fwd | GCTGGAATCAGGGAAGTTCA      |
|                  | AHA2 ChIP int4 rev | TCTGTGCCAGTTACCACTGC      |
|                  | AHA2 neg4 fwd      | TGTTGCTGATGCTACAGATGC     |
|                  | AHA2 neg4 rev      | TGGAAAATAGCTCTGCTGGTG     |
|                  | pAHA2 fwd          | GGACAAATTTTGCCTCTTTCC     |
|                  | pAHA2 rev          | CTCTCACCACTCCTTGACTGAG    |
|                  | gAHA2 fwd          | ATGTCGAGTCTCGAAGATATCAA   |
|                  | gAHA2 rev          | CACAGTGTAGTGACTGGGAGTTT   |
| ACT2 (AT3G18780) | ACT FW             | CCTTCTCAACGCCGAGCTGATTAA  |
|                  | ACT RV             | GTGGATTCCAGCAGCTTCCAT     |
