# Supplementary material
Source: PubMed Central journal article supplement (PMC6092616)
Supplement: EMBJ-37-e99134-s002.pdf [file EMBJ-37-e99134-s002.pdf]

## Expanded View Figures

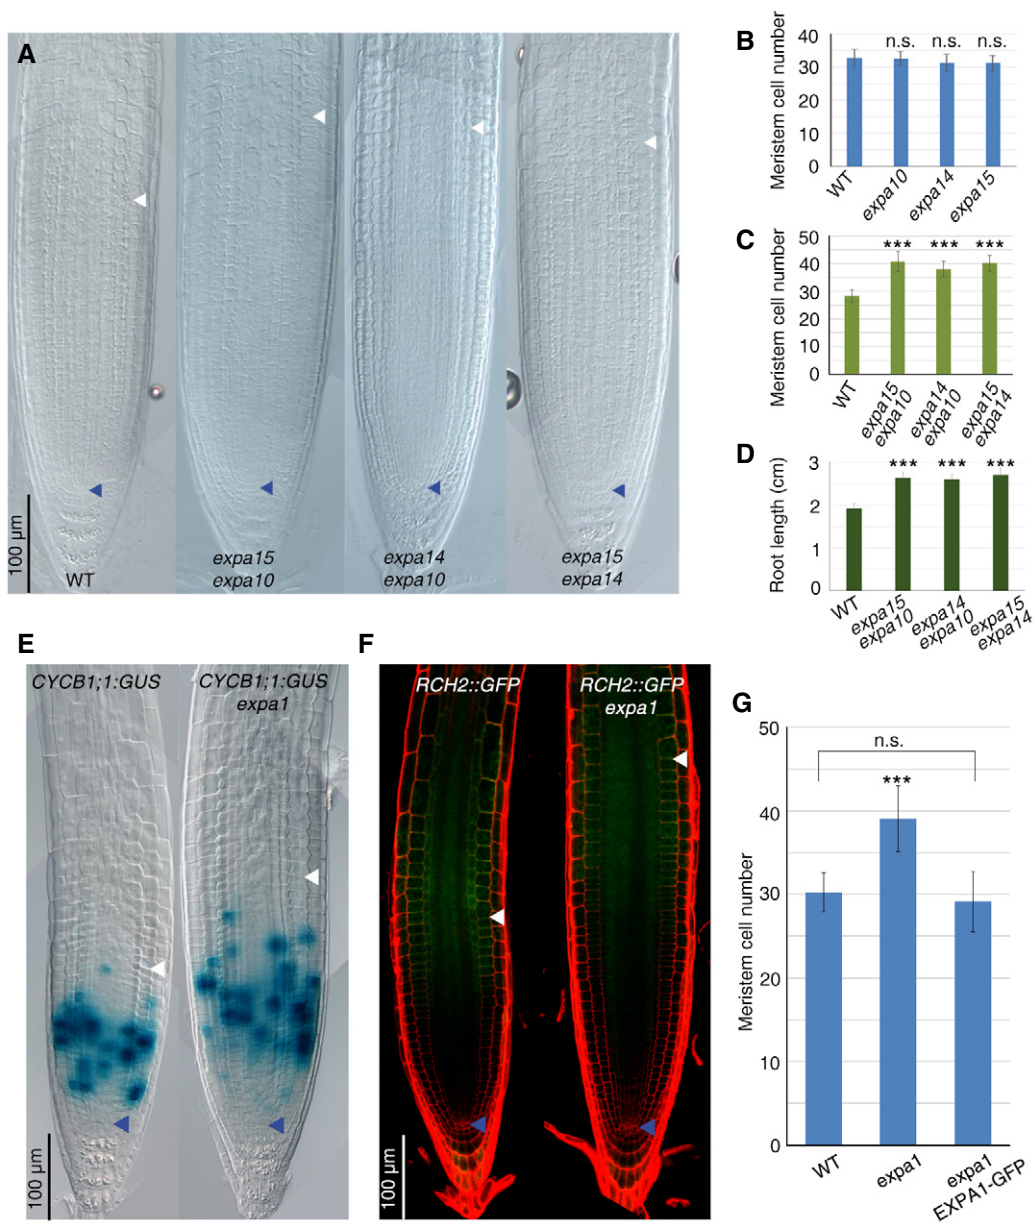

**Figure EV1. EXPA1, EXPA10, EXPA14, and EXPA15 control cell differentiation initiation at the TZ.**

A DIC microscopy images of WT, *expa15;expa10*, *expa14;expa10*, and *expa15;expa14* root tips.  
 B Root meristem cell number of the WT, *expa10*, *expa14*, and *expa15* single mutants ( $n = 50$ ). n.s. corresponds to not significant; Student's *t*-test.  
 C, D Measurement of root meristem cell number ( $n = 50$ ) (C) and root length ( $n = 15$ ) (D) of *expa15;expa10*, *expa14;expa10*, and *expa15;expa14* double mutants ( $***P < 0.001$ ; Student's *t*-test).  
 E DIC microscopy images of *CYCB1:1;GUS* ( $n = 20$ ) and *CYCB1:1;GUS;expa1* ( $n = 20$ ) roots.  
 F Confocal microscopy images of *RCH2::GFP* ( $n = 10$ ) and *RCH2::GFP;expa1* ( $n = 30$ ) roots. Note changes in TZ position in the *expa1* mutant correspond to changes in *CYCB1:1;GUS* and *RCH2::GFP* domains.  
 G Measurement of root meristem cell number of WT, *expa1*, and *expa1;EXPA1-GFP* ( $n = 50$ ).  $***P < 0.001$ , n.s. corresponds to not significant; Student's *t*-test)  
 Data information: In (A–G), experiments were performed on seedlings at 5 dpv. Blue and white arrowheads indicate the QC and the cortex TB, respectively. Error bars indicate SD.

**Figure EV2. Low pH-activated EXPA10, EXPA14, and EXPA15 proteins are expressed at the TZ and control cell differentiation.**

- A *EXPA1* fold enrichment deriving from CHIP-qPCR analysis performed on immunoprecipitated chromatin of *pARR1::ARR1:GFP* roots ( $***P < 0.001$ ; Student's *t*-test; two technical replicates performed on two independent DNA batches).
- B–D DIC microscopy images of WT roots expressing *pEXPA10-GUS* (B), *pEXPA14-GUS* (C), and *pEXPA15-GUS* (D) constructs, respectively.
- E qRT-PCR analysis of *EXPA10*, *EXPA14*, and *EXPA15* mRNA levels in the root tip of WT plants upon cytokinin treatment ( $***P < 0.001$ ; Student's *t*-test; three technical replicates performed on two independent RNA batches).
- F *EXPA10*, *EXPA14*, and *EXPA15* fold enrichment deriving from CHIP-qPCR analysis performed on immunoprecipitated chromatin of *pARR1::ARR1:GFP* roots. (Two technical replicates performed on two independent DNA batches)
- G, H Measurements of tracheids (G) and root hairs (H) distance from the QC in WT and *UBQ10-EXPA1* root tips grown on standard (5.8) or acidic (4.0) pH. ( $n = 10$ .  $**p < 0.01$ ,  $***p < 0.001$ ; Student's *t*-test).
- I Confocal microscopy images of WT ( $n = 10$ ) root tips grown on standard (5.8) pH and of *UBQ10-EXPA10* ( $n = 15$ ), *UBQ10-EXPA14* ( $n = 20$ ), and *UBQ10-EXPA15* ( $n = 15$ ) root tips grown on standard (5.8) or acidic (4.0) pH.

Data information: In (A–I), experiments were performed on seedlings at 5 dpv. Blue and white arrowheads indicate the QC and the cortex TB, respectively. Error bars indicate SD.

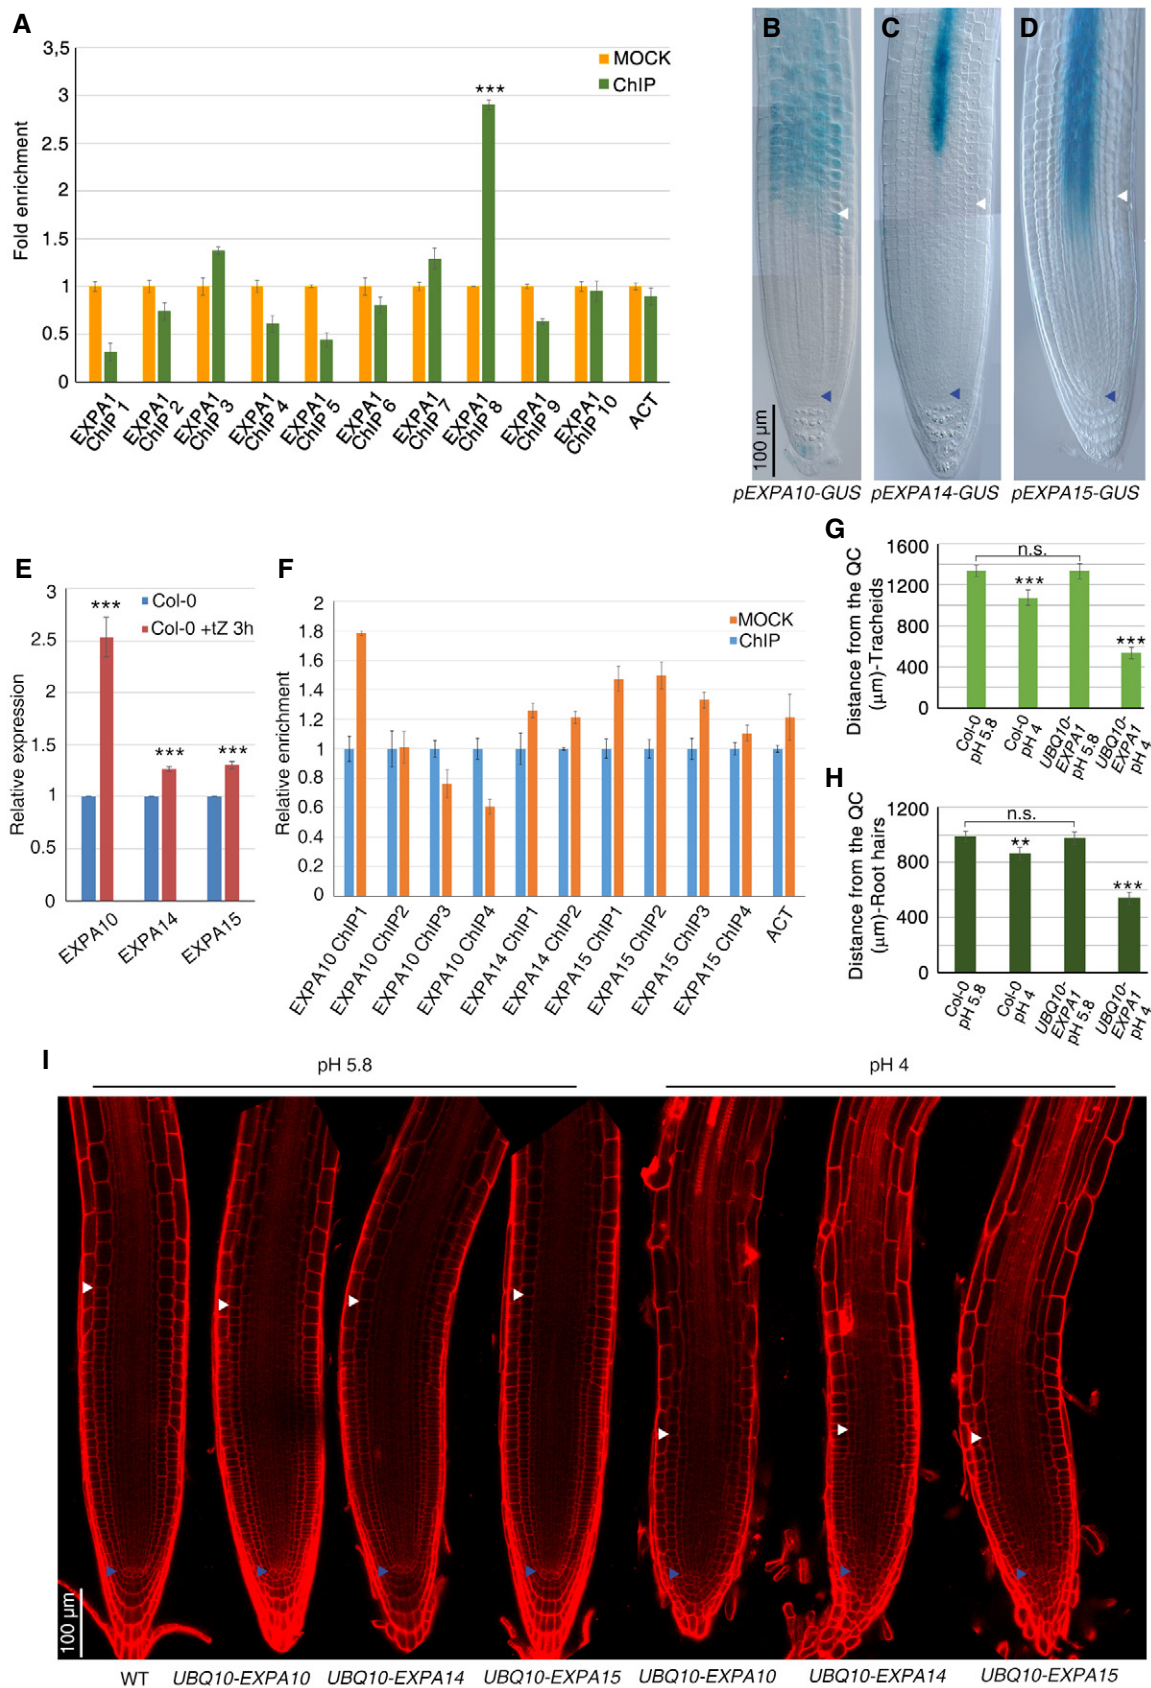

Figure EV2.

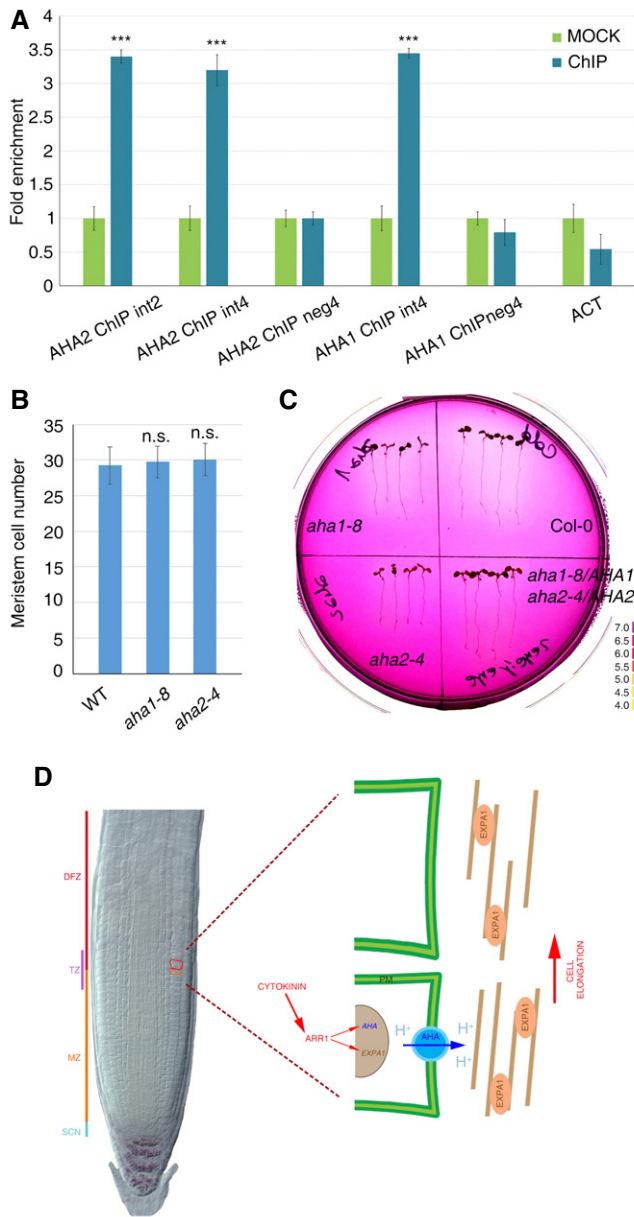

**Figure EV3. AHA1- and AHA2-dependent apoplastic acidification at the TZ induces cell differentiation.**

**A** *AHA1* and *AHA2* fold enrichment deriving from ChIP-qPCR analysis performed on immunoprecipitated chromatin of *pARR1:ARR1:GFP* roots. (\*\*\*)  $P < 0.001$ ; Student's *t*-test; two technical replicates performed on two independent DNA batches). Error bars indicate SD.

**B** Measurements of meristem cell number of *aha1-8* and *aha2-4* mutants. ( $n = 15$ . n.s. corresponds to not significant; Student's *t*-test). Error bars indicate SD.

**C** Medium acidification through proton extrusion from WT, *aha1-8*, *aha2-4*, and *aha1-8/AHA1*; *aha2-4/AHA2* seedlings, 16 h after transfer onto fresh medium containing pH indicator. ( $n = 4$ ; three replicates). Colored bar indicates pH values.

**D** Proposed model: cytokinin, via ARR1, controls both apoplastic acidification (via positive regulation of *AHA1* and *AHA2*) and cell wall (brown lines) loosening (via positive regulation of *EXPAN1*). As a result, at the TZ, cells expand and initiate the differentiation program.

Data information: In (A–C), experiments were performed on seedlings at 5 dpg.
